# Supplementary material for: High Voltage Electrical Discharges as an Alternative Extraction Process of Phenolic and Volatile Compounds from Wild Thyme (Thymus serpyllum L.): In Silico and Experimental Approaches for Solubility Assessment
Source: MDPI journal article supplement (doi:10.3390/molecules25184131), 2020-09-10
Supplement: s1 [file s1]

**Table S1.** Correlations between TPC, DPPH, FRAP and sum of all measured compounds by UPLC-MS/MS and GC-MS methods

| <b>Correlations</b>       | <b>TPC</b> | <b>DPPH</b> | <b>FRAP</b> | <b>SUM<br/>UPLC-MS/MS</b> | <b>SUM GC-MS</b> |
|---------------------------|------------|-------------|-------------|---------------------------|------------------|
| <b>TPC</b>                | 1          |             |             |                           |                  |
| <b>DPPH</b>               | 0.104      | 1           |             |                           |                  |
| <b>FRAP</b>               | 0.259      | 0.096       | 1           |                           |                  |
| <b>SUM<br/>UPLC-MS/MS</b> | 0.384      | -0.048      | 0.171       | 1                         |                  |
| <b>SUM GC-MS</b>          | -0.365     | 0.098       | -0.762      | -0.055                    | 1                |

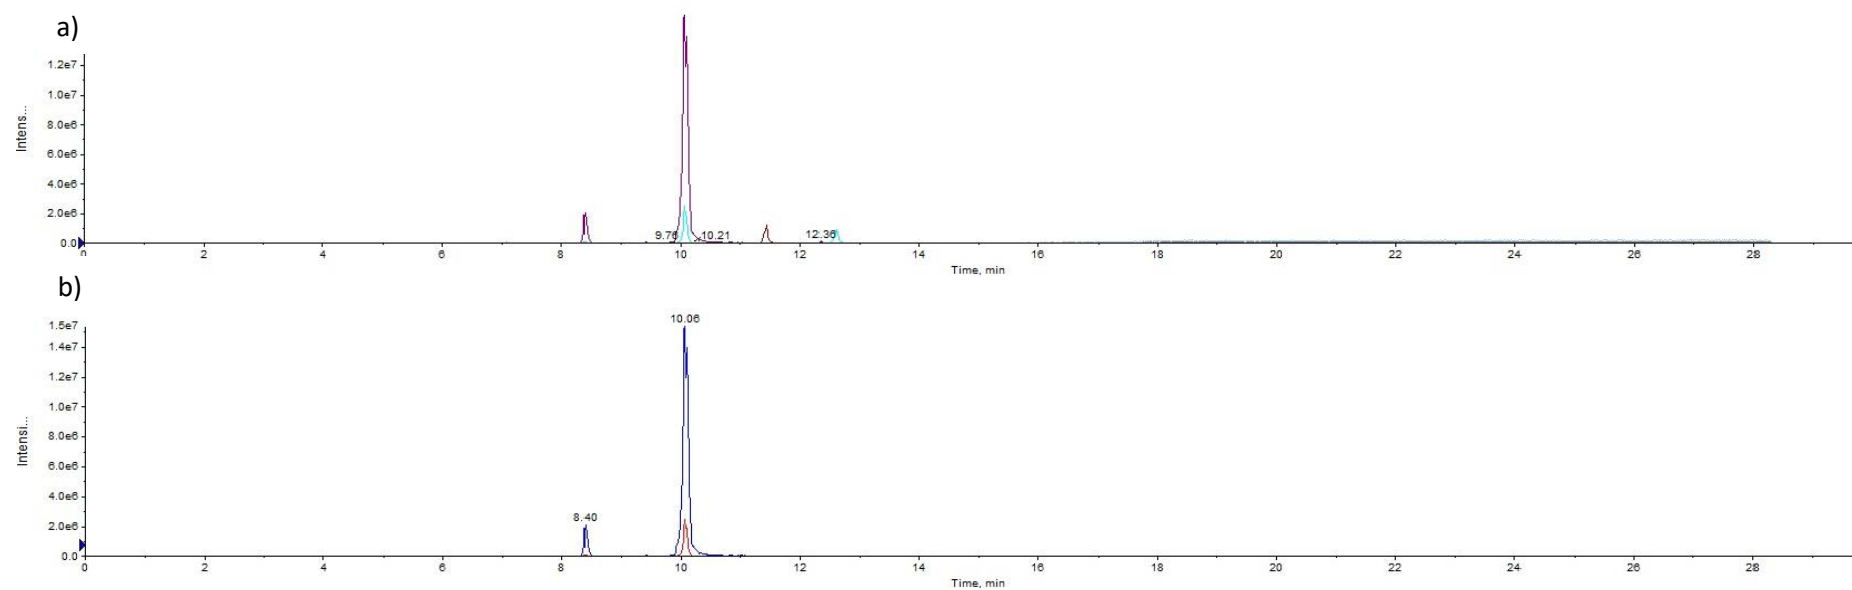

**Figure S1.** UPLC-MS/MS chromatograms of main compounds from extract 3 T0: a) apigenin) and b) rosmarinic acid

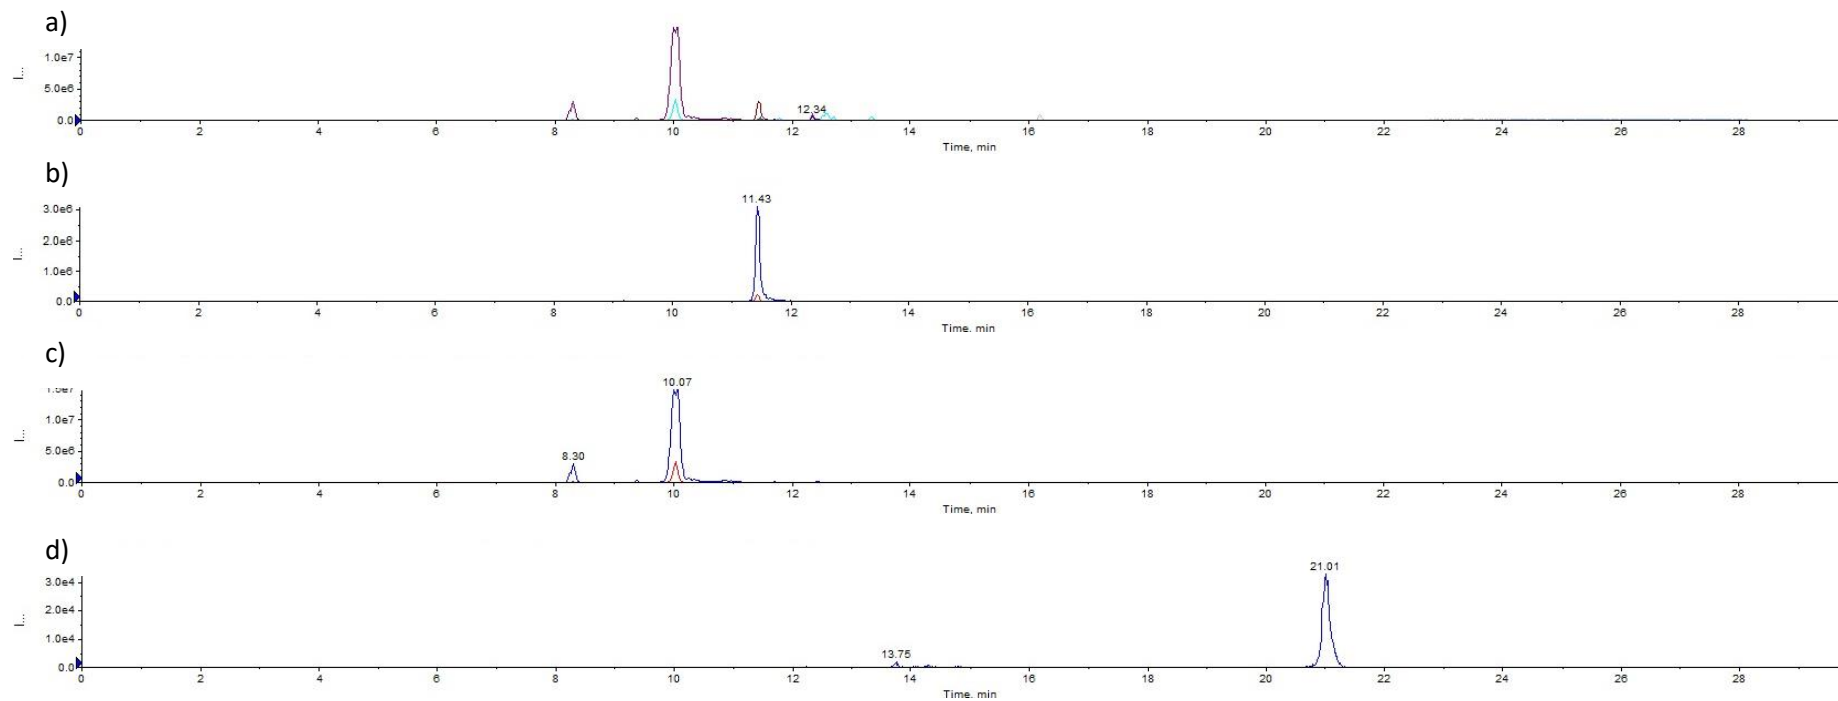

**Figure S2.** UPLC-MS/MS chromatograms of main compounds from extract TN8: a) apigenin), b) luteolin, c) rosmarinic acid, and d) oleanolic acid

a)

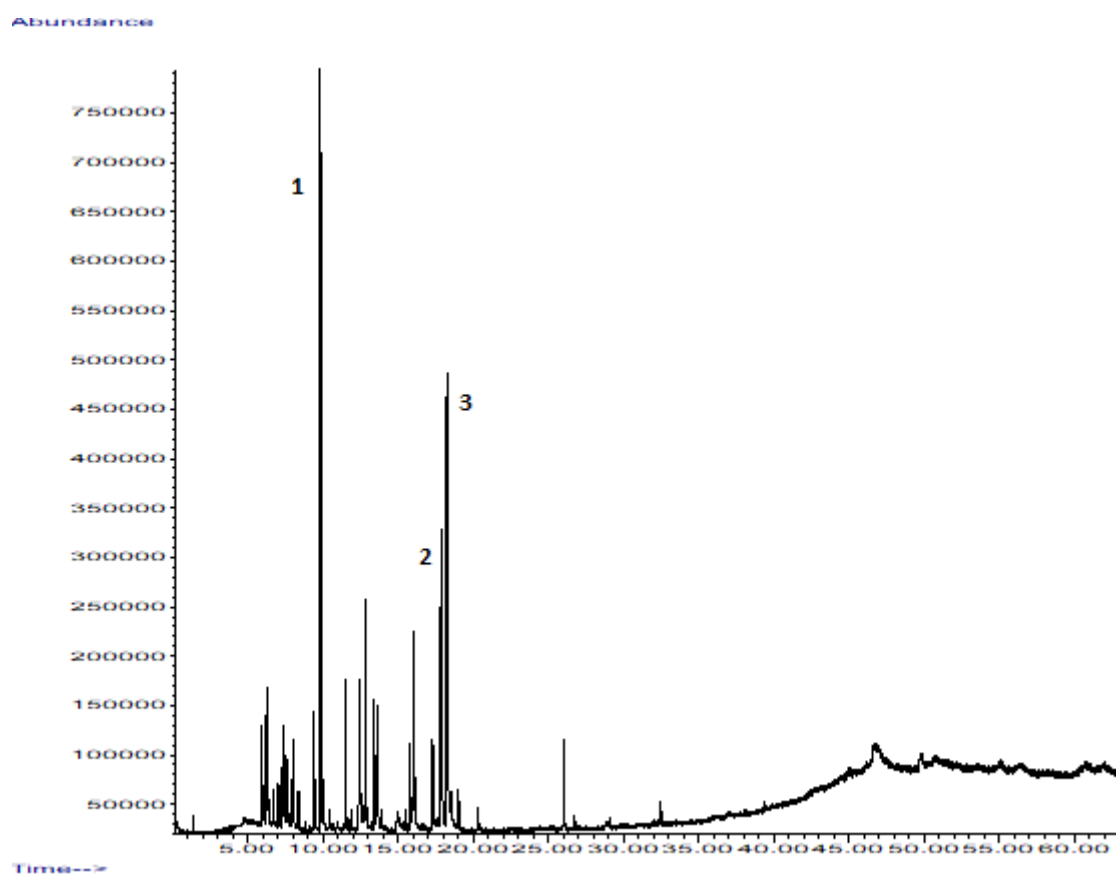

b)

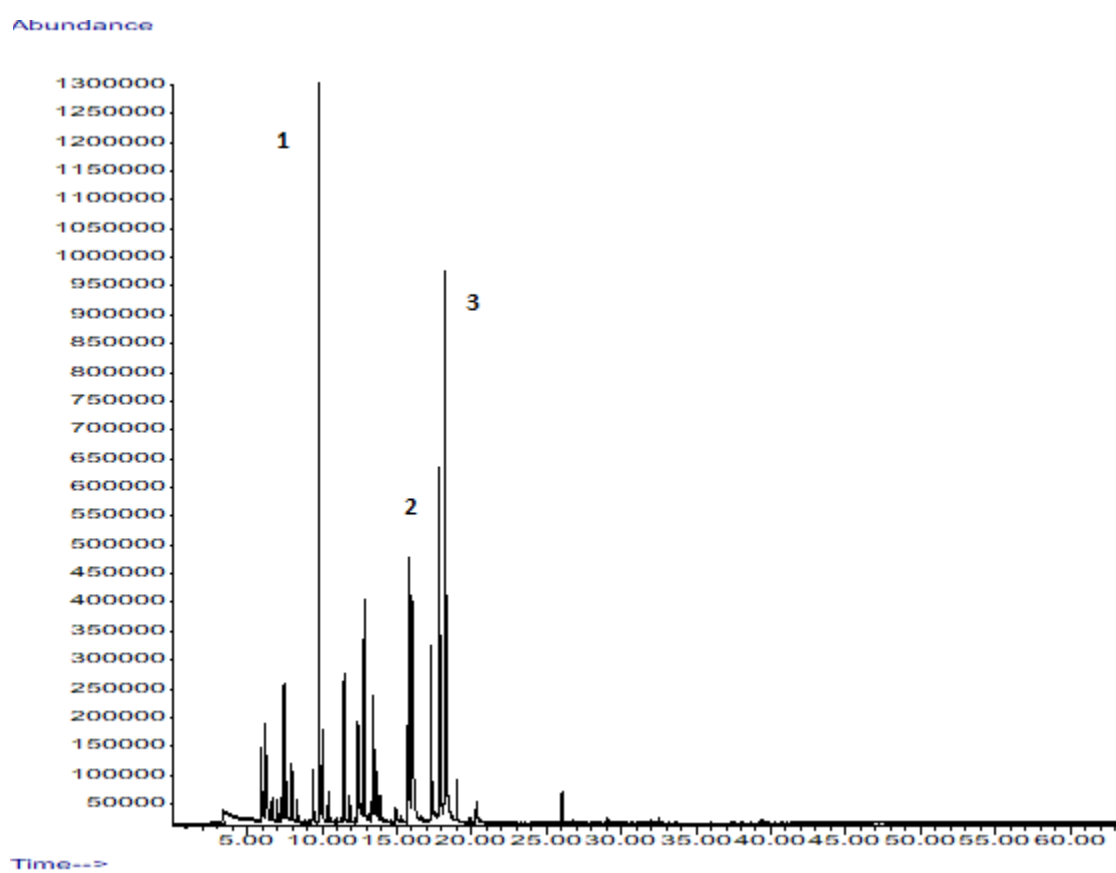

c) Abundance

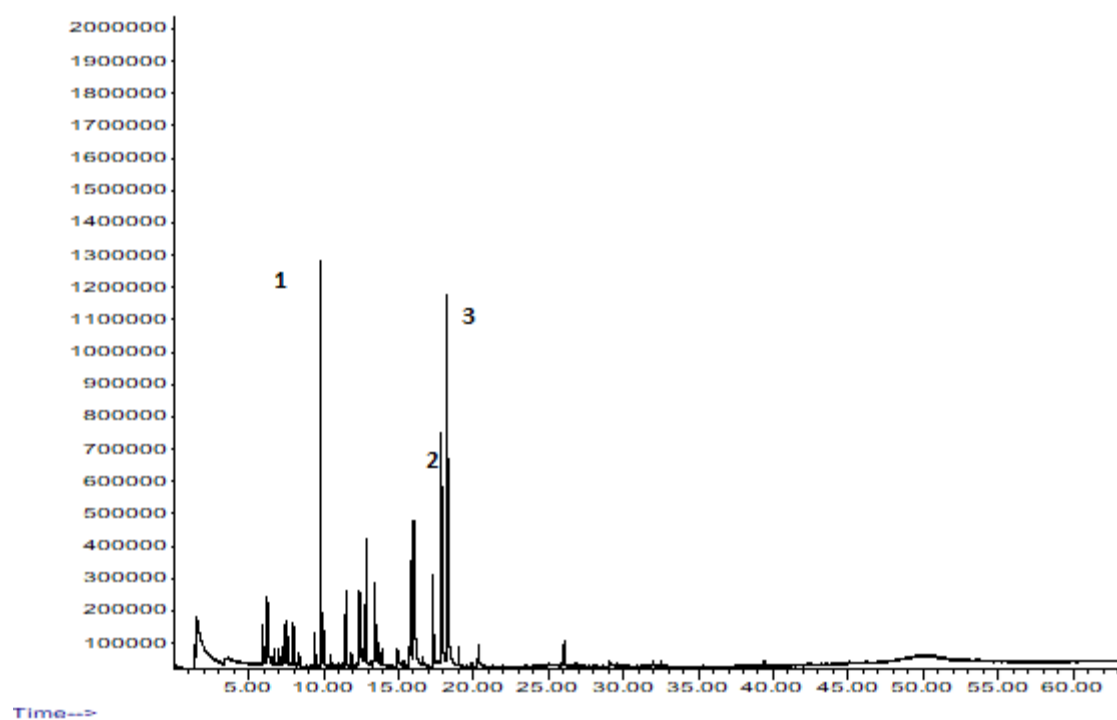

d)

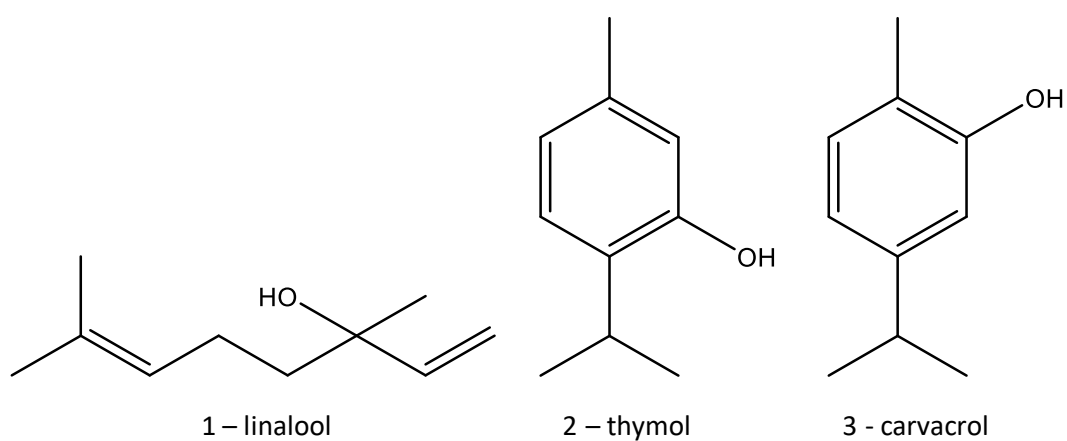

**Figure S3.** GC-MS chromatograms of extracts: a) 3 TO, b) TN4, c) TA4 and d) chemical formulas of main compounds found in wild thyme extracts
